# Supplementary material
Source: MDPI journal article supplement (https://www.mdpi.com/2073-4395/12/5/1188)
Supplement: s1 [file s1]

Table S1. Average amounts of heavy metal bioaccumulated by *M. lutarioriparius* at different harvest time.

| Organ       | Cu      |          | Mn       |          | Zn       |          | Cd     |              | Cr      |              | Pb     |          |
|-------------|---------|----------|----------|----------|----------|----------|--------|--------------|---------|--------------|--------|----------|
|             | August  | December | August   | December | August   | December | August | December     | August  | December     | August | December |
| Leaf        | 10.71 ± | 7.00 ±   | 55.44 ±  | 66.44 ±  | 32.96 ±  | 36.34 ±  | 0.19 ± | 0.34 ±       | 3.66 ±  | 3.47 ± 0.29b | 3.49 ± | 8.59 ±   |
|             | 0.41Ab  | 0.45Bb   | 4.67b    | 6.09b    | 1.06b    | 1.70b    | 0.02B  | 0.02Aab      | 0.39b   |              | 0.40B  | 0.59Aa   |
| Stem        | 15.70 ± | 13.18 ±  | 121.85 ± | 87.68 ±  | 69.18 ±  | 82.82 ±  | 0.38 ± | 0.50 ± 0.11a | 4.23 ±  | 7.00 ±       | 2.72 ± | 3.83 ±   |
|             | 1.97a   | 2.08a    | 11.36Aa  | 9.50Ba   | 12.66a   | 16.80a   | 0.11   |              | 0.43b   | 2.57ab       | 0.20B  | 0.42Ab   |
| Underground | 8.29 ±  | 11.22 ±  | 33.07 ±  | 18.99 ±  | 24.13 ±  | 26.55 ±  | 0.44 ± | 0.26 ±       | 11.23 ± | 9.31 ± 0.88a | 2.86 ± | 1.85 ±   |
|             | 0.76Bb  | 0.67Aa   | 3.86Ac   | 2.85Bc   | 3.49b    | 2.36b    | 0.10   | 0.05b        | 1.00a   |              | 0.30A  | 0.17Bc   |
| Total       | 33.26 ± | 30.20 ±  | 199.27 ± | 165.13 ± | 119.98 ± | 138.17 ± | 1.00 ± | 1.11 ± 0.14  | 19.13 ± | 19.78 ±      | 9.08 ± | 14.27 ±  |
|             | 2.33    | 2.67     | 20.22    | 17.35    | 13.72    | 18.15    | 0.20   |              | 1.35    | 2.48         | 0.60B  | 0.85A    |

Sources of variance in ANOVA (*p* value)

|             |       |        |       |       |       |        |
|-------------|-------|--------|-------|-------|-------|--------|
| Month       | 0.007 | <0.001 | 0.453 | 0.078 | 0.014 | <0.001 |
| Organ       | 0.293 | 0.039  | 0.367 | 0.597 | 0.772 | <0.001 |
| Month×Organ | 0.023 | 0.011  | 0.782 | 0.081 | 0.169 | <0.001 |

Values (Mean± SE, mg m<sup>-2</sup>) with different lowercase letters in the same column indicate significant differences among the underground organs, stems and leaves at *p* < 0.05.

Different uppercase letters in the same row indicate significant differences between the two growth seasons at *p* < 0.01.
